# Supplementary material for: Crohn's disease is facilitated by a disturbance of programmed death‐1 ligand 2 on blood dendritic cells
Source: PubMed Central journal article supplement — Clin Transl Immunology. 2019 Jul 25;8(7):e01071. doi: 10.1002/cti2.1071 (PMC6657371; doi:10.1002/cti2.1071), 2019-07-25
Supplement: CTI2-8-e01071-s001.pdf [file CTI2-8-e01071-s001.pdf]

### Supplementary Figure 1

#### Non-CD Controls

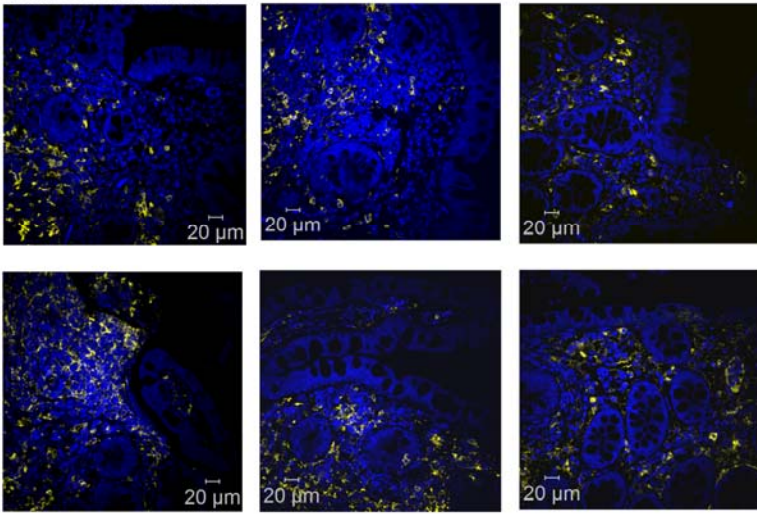

#### Inflamed CD

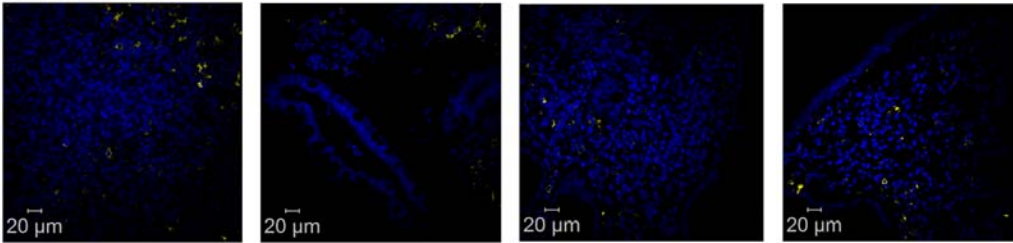

#### Non-Inflamed CD

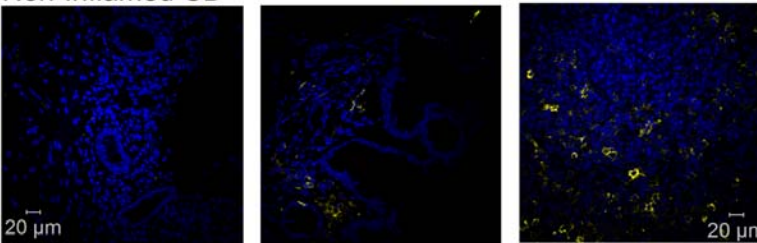

### Supplementary Figure 1: Loss of DCs in the ileum during CD.

Additional representative examples of ileal tissue labelled for CD11c (yellow) and DAPI (blue) from control or inflamed and non-inflamed ileum tissue from CD patients. Replicate examples highlight the loss of CD11c<sup>+</sup> DCs (yellow) between disease and non-diseased tissue. Scale bar represents 20 µm.

## Supplementary Figure 2

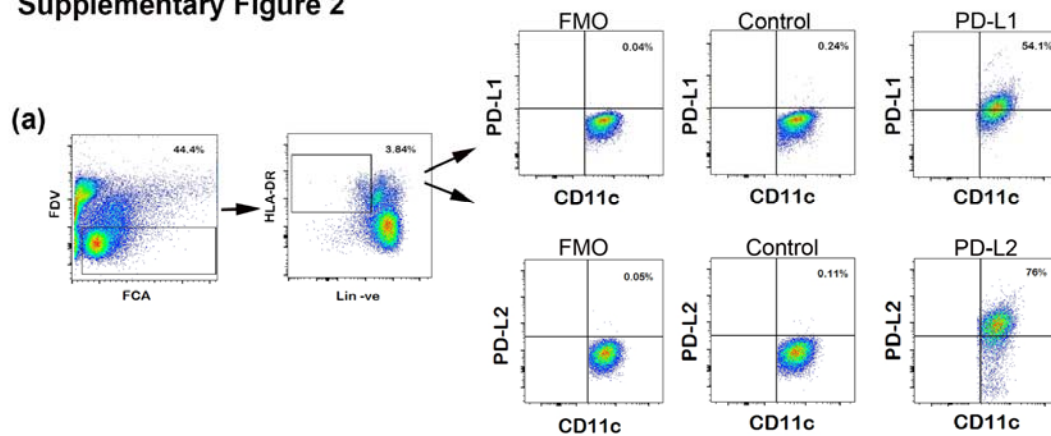

### Supplementary Figure 2: Loss of DCs in the ileum during CD.

Representative gating strategy used to assess PD-L1 and PD-L2 expression on CD11c<sup>+</sup> DCs from blood by flow cytometry of a CD patient compared to the isotype control and Fluorescence Minus One (FMO).
